# Supplementary material
Source: PubMed Central journal article supplement (PMC4057944)
Supplement: NIHMS565465-supplement-supplement_1.pdf [file NIHMS565465-supplement-supplement_1.pdf]

## Supplementary Materials

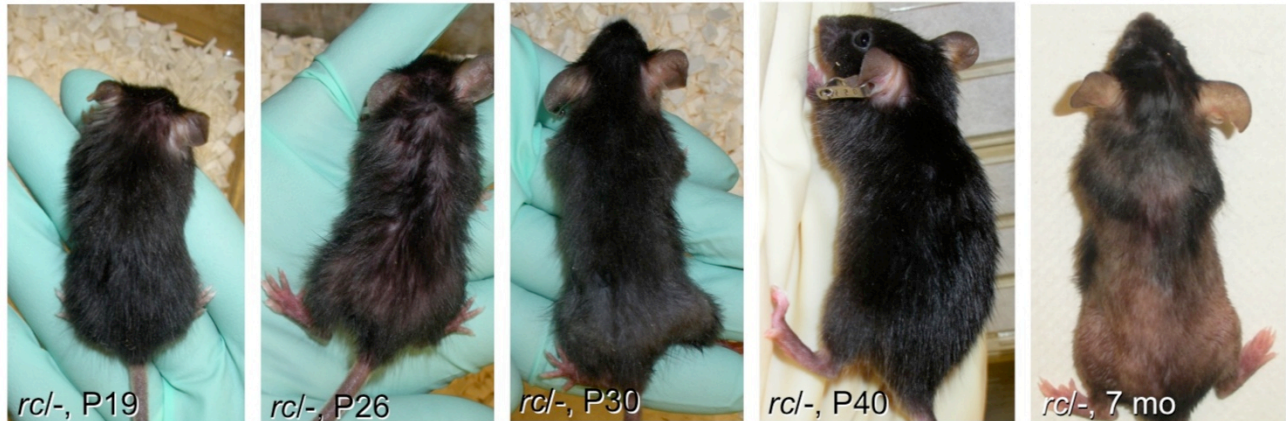

Figure S1. Mice heterozygous for both the *Mpz13* knockout allele and the *rc* allele (*rc*/-) developed gross hair abnormalities similar to those observed in the *rc/rc* and *Mpz13* *-/-* mice.

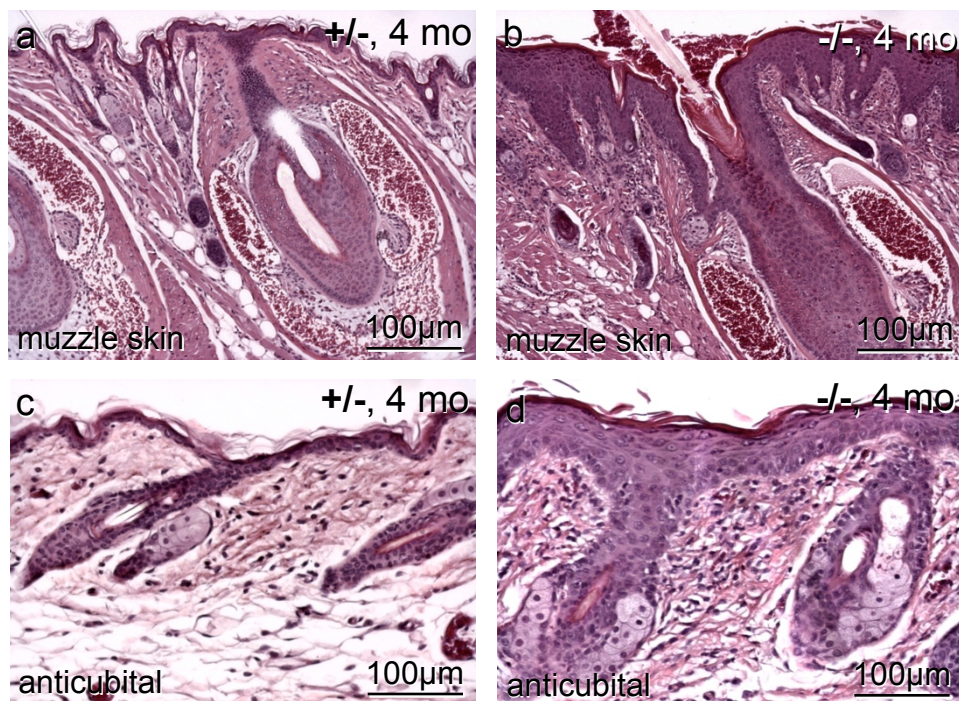

Figure S2. Inflammatory skin lesions in the muzzle skin (b) and anticubital area (d) in the *Mpz13* *-/-* mice but not control littermates (a, c).

## Supplementary Materials

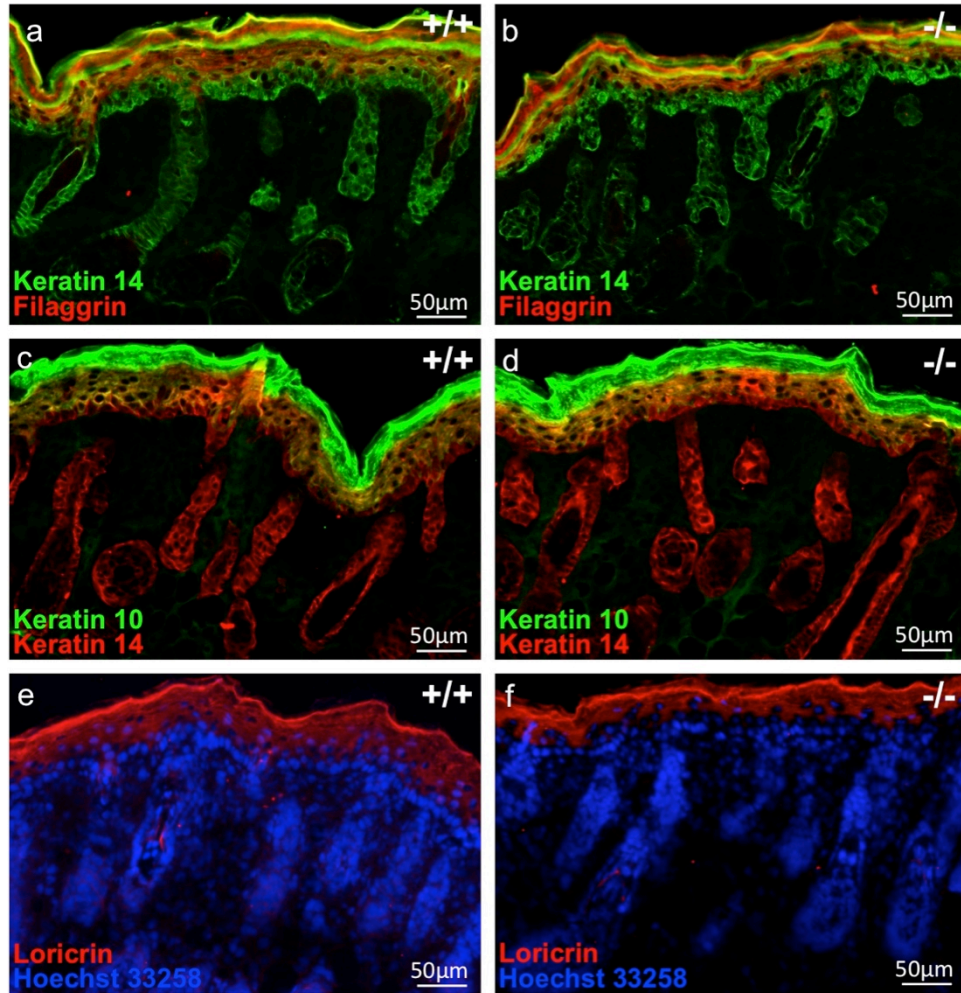

Figure S3. Indirect immunofluorescent staining of epidermal keratinocyte differentiation marker expression in newborn (P2) *Mpz/3*  $+/+$  and  $-/-$  littermate skin sections.

## Supplementary Materials

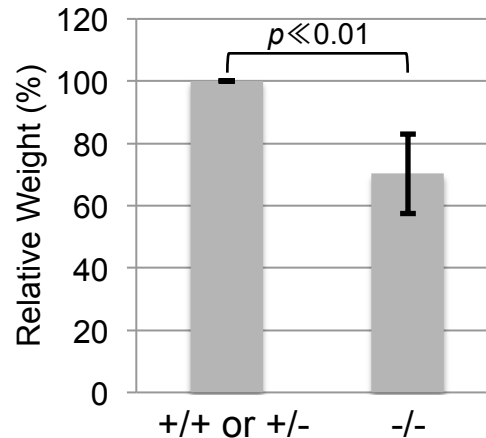

Figure S4. Relative body weight of *Mpz13* *-/-* mice more than 6 months old compared with *+/+* or *+/-* sex-matched littermates. N=20 each, bars = standard deviation, paired *t*-test.

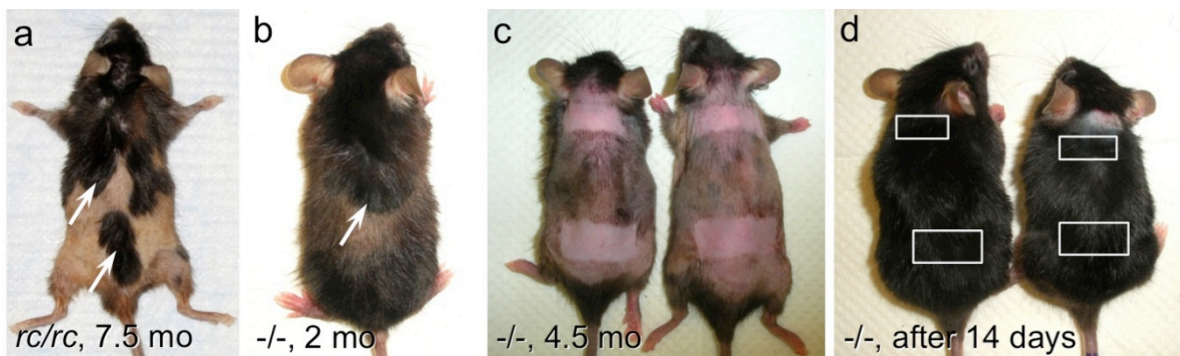

Figure S5. Spontaneous (a, b) and induced (c, d) regrowth of pigmented hair in *rc/rc* (a) and *Mpz13* *-/-* (b~d) mice with patches of vellus-like hair. Arrows point to newly regrown hair (a, b).

Table S1. PCR primer sequences.

|                                    | Forward Primer       | Reverse Primer        | Amplicon (bp) |
|------------------------------------|----------------------|-----------------------|---------------|
| <b>For genotyping:</b>             |                      |                       |               |
| Wild type <i>Mpz13</i> allele      | GGGCACATTCCGAGACCG   | AGCATGAGAAGAGACTGGCA  | 206           |
| <i>Mpz13</i> <i>rc</i> allele      | CGGGCACATTCCGAGACCA  | AGCATGAGAAGAGACTGGCA  | 206           |
| <i>Mpz13</i> knockout allele (neo) | AGCTGTGCTCGACGTTGTAC | GATCATCCTGATCGACAAGAC | 239           |
| <b>For RT-PCR:</b>                 |                      |                       |               |
| GAPDH                              | AGAACATCATCCCTGCATCC | CTGTTGAAGTCGCAGGAGAC  | 253           |
| <i>Mpz13</i> F1-R1                 | AAGCTGACCATAGACTGGAC | ACGAAGACGAGGATGGAGAG  | 317           |
| <i>Mpz13</i> F2-R2                 | CGTCCATCAGTATCAGCAAC | ACGAAGACGAGGATGGAGAG  | 172           |
